# Supplementary material
Source: publisher figshare collection journal article supplement (https://acs.figshare.com/ndownloader/files/5099494)
Supplement: Supplementary file 1 [file 5099494]

# Selective Removal of Metallic Single-Walled Carbon Nanotubes with Small-Diameters by Using Nitric and Sulfuric Acids

*Cheol-Min Yang<sup>†</sup>, Jin Sung Park<sup>†</sup>, Kay Hyeok An<sup>†</sup>, Seong Chu Lim<sup>†</sup>, Kwanyong Seo<sup>‡</sup>, Bongsoo Kim<sup>‡</sup>, Kyung Ah Park<sup>†</sup>, Seungwu Han<sup>§</sup>, Chong Yun Park<sup>†</sup>, and Young Hee Lee<sup>\*,†</sup>*

BK21 Physics Division, Institute of Basic Science, Center for Nanotubes and Nanostructured Composites, Sungkyunkwan University, Suwon 440-746, Republic of Korea,

Department of Chemistry, Korea Advanced Institute of Science & Technology, 373-1, Guseong-dong, Yuseong-gu, Daejeon 305-701, Republic of Korea,

Department of Physics, Division of Nano Science, Ewha Womans University, Seoul 120-750, Republic of Korea

# Supporting Information-Figure S1

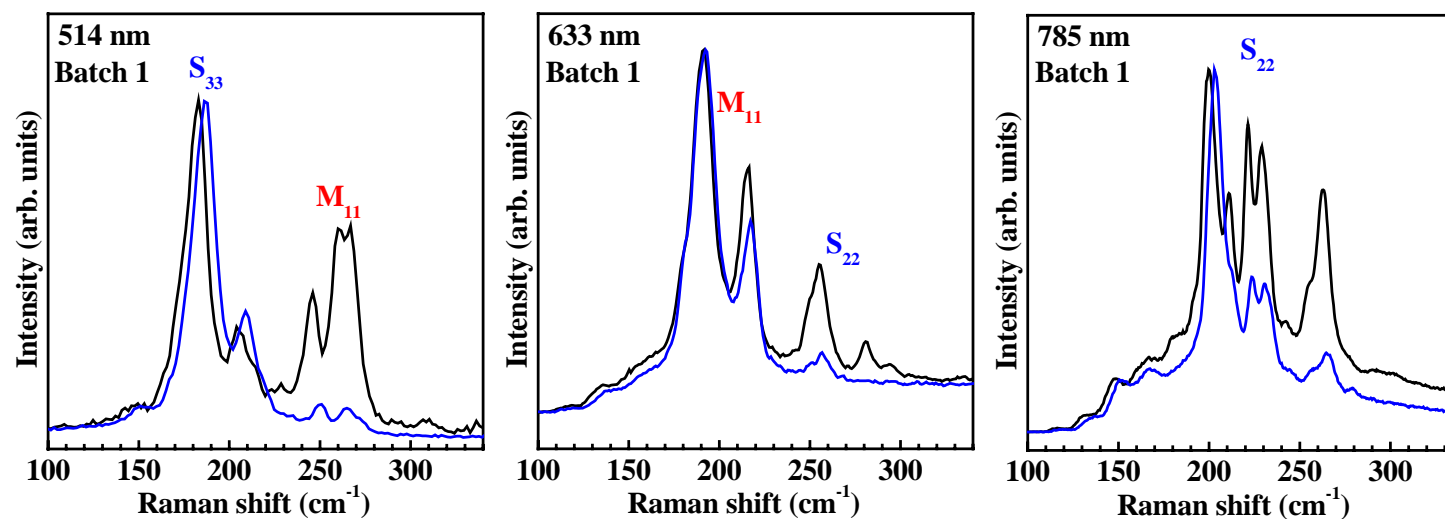

**Figure S1.** RBM Raman spectra for batch 1 HiPco SWCNTs at 514, 633, and 785 nm excitation wavelengths. The black and blue lines are from the pristine and air-oxidized HiPco SWCNTs (at 350 °C in air atmosphere).  $M_{ij}$  and  $S_{ij}$  correspond to metallic and semiconducting interband transitions. Gas-phase oxidation treatment led to diameter-selective removal of SWCNTs, regardless of metallicity.

**Fig. S1. Yang et al.**

## Supporting Information-Figure S2

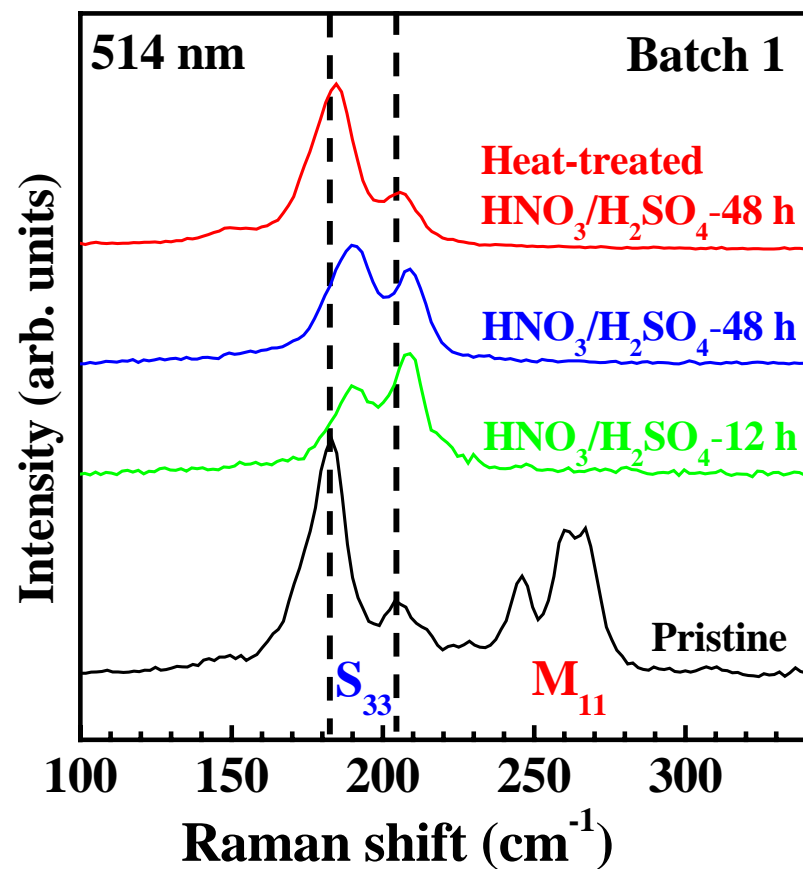

**Figure S2.** RBM Raman spectra from the leftover on the filter for batch 1 HiPco SWCNTs at 514 nm excitation wavelength. The black, green, blue, and red lines are from the pristine,  $\text{HNO}_3/\text{H}_2\text{SO}_4$  (1:9) treatment for 12 h, 48 h, and  $\text{HNO}_3/\text{H}_2\text{SO}_4$  (1:9) treatment for 48 h followed by heat treatment at 900 °C in Ar atmosphere, respectively. The peak shift was recovered after the heat treatment.

**Fig. S2. Yang *et al.***

## Supporting Information-Figure S3

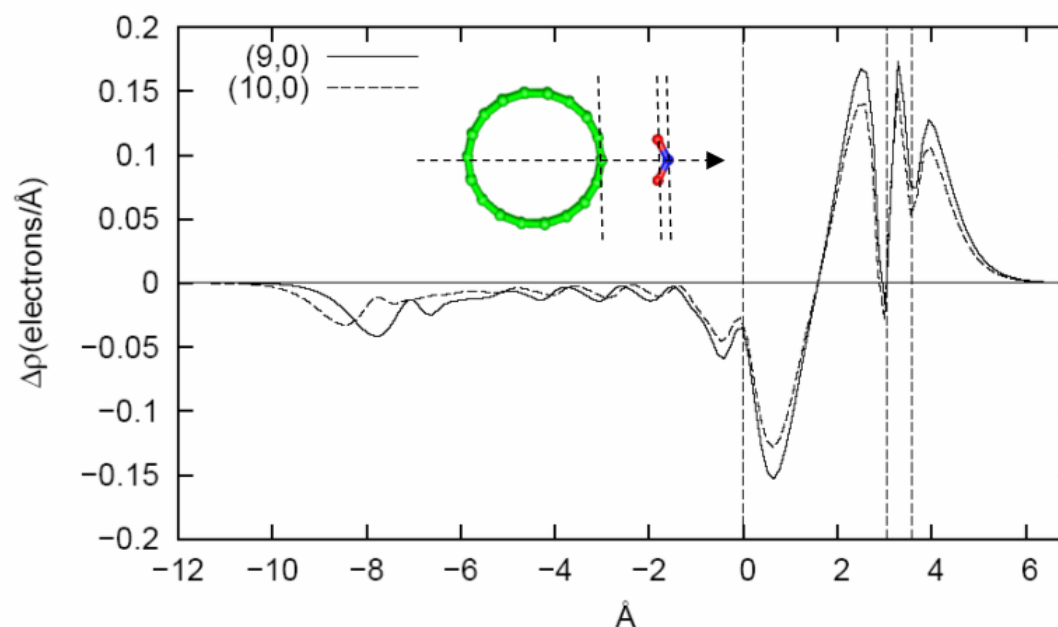

**Figure S3.** The redistribution of electronic density was calculated by  $\Delta\rho = \rho(\text{CNT}+\text{NO}_2) - \rho(\text{CNT}) - \rho(\text{NO}_2)$ . The figure was drawn along the arrowed direction shown in the inset figure and  $\Delta\rho$  is averaged over the plane perpendicular to the plotting direction. Three vertical lines in the inset and figure indicate the positions of the outermost C, O, and N atoms, respectively. The enhanced charge transfer of metallic (9,0) nanotube was clearly visible.

**Fig. S3. Yang *et al.***
